## Correction: Oncogenomics of c-Myc transgenic mice reveal novel regulators of extracellular signaling, angiogenesis and invasion with clinical significance for human lung adenocarcinoma

Yari Ciribilli<sup>1,2</sup> and Jürgen Borlak<sup>2</sup>

<sup>1</sup> Centre for Integrative Biology (CIBIO), University of Trento, 38123 Povo (TN), Italy

<sup>2</sup> Centre for Pharmacology and Toxicology, Hannover Medical School, 30625 Hannover, Germany

**Published:** December 14, 2018

**Copyright:** Ciribilli et al. This is an open-access article distributed under the terms of the Creative Commons Attribution License 3.0 (CC BY 3.0), which permits unrestricted use, distribution, and reproduction in any medium, provided the original author and source are credited.

**This article has been corrected:** The given microarray GEO information in the Materials and Methods section refers to a previous study from 2008 (PMID: 18498649); it has been listed incorrectly. The proper listing is shown below:

The microarray study is MIAME compliant, and the raw data have been deposited in GEO database (GSE54829; <http://www.ncbi.nlm.nih.gov/geo>).

Original article: Oncotarget. 2017; 8:101808-101831. <https://doi.org/10.18632/oncotarget.21981>
